# Supplementary material for: Validation of the AJCC prognostic stage for HER2-positive breast cancer in the ShortHER trial
Source: Springer Nature journal article supplement (doi:10.1186/s12916-019-1445-z), 2019-11-21
Supplement: MOESM1 [file 17415812]

**Additional file 1. Summary of details of studies aimed at evaluating the American Joint Committee on Cancer (AJCC) 8<sup>th</sup> edition breast cancer prognostic staging.**

| Study                                                     | Cohort                                                            | Years                             | N                             | Discordance prognostic vs anatomic stage*                                                  | HER2+ N                | HER2+ treated with trastuzumab (%)                   | HER2+: Discordance prognostic vs anatomic stage* | HER2+: performance of prognostic stage |
|-----------------------------------------------------------|-------------------------------------------------------------------|-----------------------------------|-------------------------------|--------------------------------------------------------------------------------------------|------------------------|------------------------------------------------------|--------------------------------------------------|----------------------------------------|
| Weiss A, JAMA Oncol 2017 <sup>1</sup>                     | MD Anderson (MD) & California Cancer Registry (CCR) Retrospective | 2007-2013 (MD)<br>2005-2009 (CCR) | 3327 (MD)<br>54727 (CCR)      | 57.6% (MD), 51.6% (CCR)<br>Down: 29.5% (MD),<br>31.0% (CCR)<br>Up: 28.1% (MD), 20.6% (CCR) | 306 (MD)<br>9676 (CCR) | Not reported                                         | Not reported                                     | Not reported                           |
| Plichta J, Annals Surg 2018 <sup>2</sup>                  | National Cancer Database Retrospective**                          | 2010-2014                         | 493854                        | 36.6%<br>Down: 29.7%<br>Up: 6.8%                                                           | 60155                  | Not reported                                         | 29.4%<br>Down: 29.4%<br>Up: 0%                   | Not reported                           |
| Abdel-Rahman O, Breast Cancer Res Treat 2018 <sup>3</sup> | SEER-18 registry Retrospective**                                  | 2010-2014                         | 209304                        | Not reported                                                                               | 25347                  | Not reported                                         | Not reported                                     | Not reported                           |
| Shao N, Cancer Manag Res 2019 <sup>4</sup>                | SEER-18 registry Retrospective**                                  | 2010-2014                         | 168076                        | 53.2%<br>Down: 22.1%<br>Up: 31.1%                                                          | 25446                  | Not reported                                         | Not reported                                     | Not reported                           |
| Kim I, J Breast Cancer 2018 <sup>5</sup>                  | Korean Breast Cancer Society Retrospective                        | 2009-2012                         | 49248                         | 45.8%<br>Down: 26.1%<br>Up: 19.4%                                                          | 4964                   | N=4342 received target therapy                       | Not reported                                     | Not reported                           |
| Liu Y-Y, Future Oncol 2019 <sup>6</sup>                   | SEER database Retrospective**                                     | 2010-2014                         | 19608<br>all triple negative  | Not reported in detail                                                                     | 0                      | -                                                    | -                                                | -                                      |
| Wang M, The Breast 2018 <sup>7</sup>                      | SEER-18 registry Retrospective**                                  | 2010-2013                         | 10053<br>all locally advanced | 74%<br>Down: 33%<br>Up: (41%)                                                              | 2576                   | Not reported                                         | 69%<br>Down: 35.1%<br>Up: 33.9%                  | Not reported                           |
| Lee SB, Breast Cancer Res Treat 2018 <sup>8</sup>         | Asan Medical Center Retrospective                                 | 1999-2008                         | 7458                          | Not reported                                                                               | 1982                   | 0%                                                   | Not reported                                     | Not reported                           |
| Wong RX, The Breast 2018 <sup>9</sup>                     | SingHealth institutions Retrospective                             | 2006-2014                         | 6287                          | 46.5%<br>Down: 40.7%<br>Up: 5.8%                                                           | 1497                   | 86% of 1116 HER2+ patients treated with chemotherapy | Not reported                                     | Not reported                           |

|                                                     |                                                       |           |                          |                                   |     |                                   |                                        |                                                                  |
|-----------------------------------------------------|-------------------------------------------------------|-----------|--------------------------|-----------------------------------|-----|-----------------------------------|----------------------------------------|------------------------------------------------------------------|
| Kurundkar A, Clin Breast Cancer 2018 <sup>10</sup>  | The University of Alabama at Birmingham Retrospective | 1998-2013 | 6050                     | 52.4%<br>Down: 24.7%<br>Up: 27.7% | 561 | Not reported                      | Not reported                           | Not reported                                                     |
| Kim J-Y, Breast Cancer Res Treat 2018 <sup>11</sup> | Samsung Medical Center Retrospective                  | 2004-2008 | 2790                     | 58.1%<br>Down: 23.4%<br>Up: 34.7% | 562 | Mostly untreated with trastuzumab | Not reported                           | DSS log-rank p 0.014 (HR+/HER2+, n=260) and p<0.001 (HR-/HER2+). |
| Savage P, Eur J Surg Oncol 2019 <sup>12</sup>       | McGill University Health Centre Retrospective         | 2010-2013 | 1703                     | 46.2%<br>Down: 7.5%<br>Up: 38.8%  | 259 | Not reported                      | Not reported                           | Not reported                                                     |
| Hu H, World J Oncol 2017 <sup>13</sup>              | Peking University Shenzhen Hospital Retrospective     | 2011-2016 | 784                      | 45.7%<br>Down: 27.9%<br>Up: 17.7% | 238 | Not reported                      | Not reported                           | Not reported                                                     |
| Jang N, Virchows Archiv 2019 <sup>14</sup>          | Yeungnam University Hospital Retrospective            | 2005-2007 | 714                      | 45.5%<br>Down: 35.6%<br>Up: 9.9%  | 129 | 0%                                | 30.2%<br>Down: 30.2%<br>Up: 0%         | Not reported                                                     |
| Ye J, Chin J Cancer Res 2017 <sup>15</sup>          | Peking University First Hospital Retrospective        | 2008-2014 | 421<br>all Luminal A     | 41.6%<br>Down: 40.2%<br>Up: 1.4%  | 0   | -                                 | -                                      | -                                                                |
| Zhou B, Anticancer Res 2017 <sup>16</sup>           | Peking University First Hospital Retrospective        | 2008-2014 | 170<br>all HER2 enriched | -                                 | 170 | 44%                               | 68.8%<br>All upstaged except 1 patient | OS log-rank p<0.001 for anatomic and prognostic stage            |

Abbreviations: N, number; OS, overall survival; DSS, disease specific-survival; HR, hormone receptor

\*Down: assigned to a more favorable stage by prognostic stage vs anatomic stage (i.e. prognostic stage IA and anatomic stage IB)

Up: assigned to a less favorable stage by prognostic stage vs anatomic stage (i.e. prognostic stage IIA and anatomic stage IB)

\*\*Studies using the National Cancer Database or the SEER registry over a period of time including years 2010-2011. These studies used data partially overlapping with those used by the AJCC panel to develop the prognostic stage.

## References

1. Weiss A, Chavez-MacGregor M, Lichtensztajn DY, et al. Validation Study of the American Joint Committee on Cancer Eighth Edition Prognostic Stage Compared With the Anatomic Stage in Breast Cancer. *JAMA Oncol.* 2018;4(2):203-209.
2. Plichta JK, Ren Y, Thomas SM, et al. Implications for Breast Cancer Restaging Based on the 8th Edition AJCC Staging Manual. *Ann Surg.* 2018.
3. Abdel-Rahman O. Validation of the 8th AJCC prognostic staging system for breast cancer in a population-based setting. *Breast Cancer Res Treat.* 2018;168(1):269-275.
4. Shao N, Xie C, Shi Y, et al. Comparison of the 7th and 8th edition of American Joint Committee on Cancer (AJCC) staging systems for breast cancer patients: a Surveillance, Epidemiology and End Results (SEER) Analysis. *Cancer Manag Res.* 2019;11:1433-1442.
5. Kim I, Choi HJ, Ryu JM, et al. Prognostic Validation of the American Joint Committee on Cancer 8th Staging System in 24,014 Korean Patients with Breast Cancer. *J Breast Cancer.* 2018;21(2):173-181.
6. Liu YY, Yu TJ, Liu GY. The predictive value of the prognostic staging system in the 8th edition of the American Joint Committee on Cancer for triple-negative breast cancer: a SEER population-based analysis. *Future Oncol.* 2019;15(4):391-400.
7. Wang M, Chen H, Wu K, Ding A, Zhang M, Zhang P. Evaluation of the prognostic stage in the 8th edition of the American Joint Committee on Cancer in locally advanced breast cancer: An analysis based on SEER 18 database. *Breast.* 2018;37:56-63.

8. Lee SB, Sohn G, Kim J, et al. A retrospective prognostic evaluation analysis using the 8th edition of the American Joint Committee on Cancer staging system for breast cancer. *Breast Cancer Res Treat.* 2018;169(2):257-266.
9. Wong RX, Wong FY, Lim J, Lian WX, Yap YS. Validation of the AJCC 8th prognostic system for breast cancer in an Asian healthcare setting. *Breast.* 2018;40:38-44.
10. Kurundkar A, Gao X, Zhang K, Britt JP, Siegal GP, Wei S. Comparison of AJCC Anatomic and Clinical Prognostic Stage Groups in Breast Cancer: Analysis of 3322 Cases From a Single Institution. *Clin Breast Cancer.* 2018;18(6):e1347-e1352.
11. Kim JY, Lim JE, Jung HH, et al. Validation of the new AJCC eighth edition of the TNM classification for breast cancer with a single-center breast cancer cohort. *Breast Cancer Res Treat.* 2018;171(3):737-745.
12. Savage P, Yu N, Dumitra S, Meterissian S. The effect of the American Joint Committee on Cancer eighth edition on breast cancer staging and prognostication. *Eur J Surg Oncol.* 2019.
13. Hu H, Wei W, Yi X, Xin L, Liu Y. A Retrospective Analysis of Clinical Utility of AJCC 8th Edition Cancer Staging System for Breast Cancer. *World J Oncol.* 2017;8(3):71-75.
14. Jang N, Choi JE, Kang SH, Bae YK. Validation of the pathological prognostic staging system proposed in the revised eighth edition of the AJCC staging manual in different molecular subtypes of breast cancer. *Virchows Arch.* 2019;474(2):193-200.

15. Ye J, Wang W, Xu L, et al. A retrospective prognostic evaluation analysis using the 8th edition of American Joint Committee on Cancer (AJCC) cancer staging system for luminal A breast cancer. *Chin J Cancer Res.* 2017;29(4):351-360.
  
16. Zhou B, Xu L, Ye J, Xin L, Duan X, Liu Y. The Prognostic Value of the 8th Edition of the American Joint Committee on Cancer (AJCC) Staging System in HER2-Enriched Subtype Breast Cancer, a Retrospective Analysis. *Anticancer Res.* 2017;37(8):4615-4621.
